# Supplementary material for: Tumor Cell–Autonomous SHP2 Contributes to Immune Suppression in Metastatic Breast Cancer
Source: PubMed Central journal article supplement (PMC10035406; doi:10.1158/2767-9764.crc-22-0117), 2022-10-03
Supplement: crc-22-0117-s05.pdf [file crc-22-0117-s05.pdf]

## Supplementary Figure 3

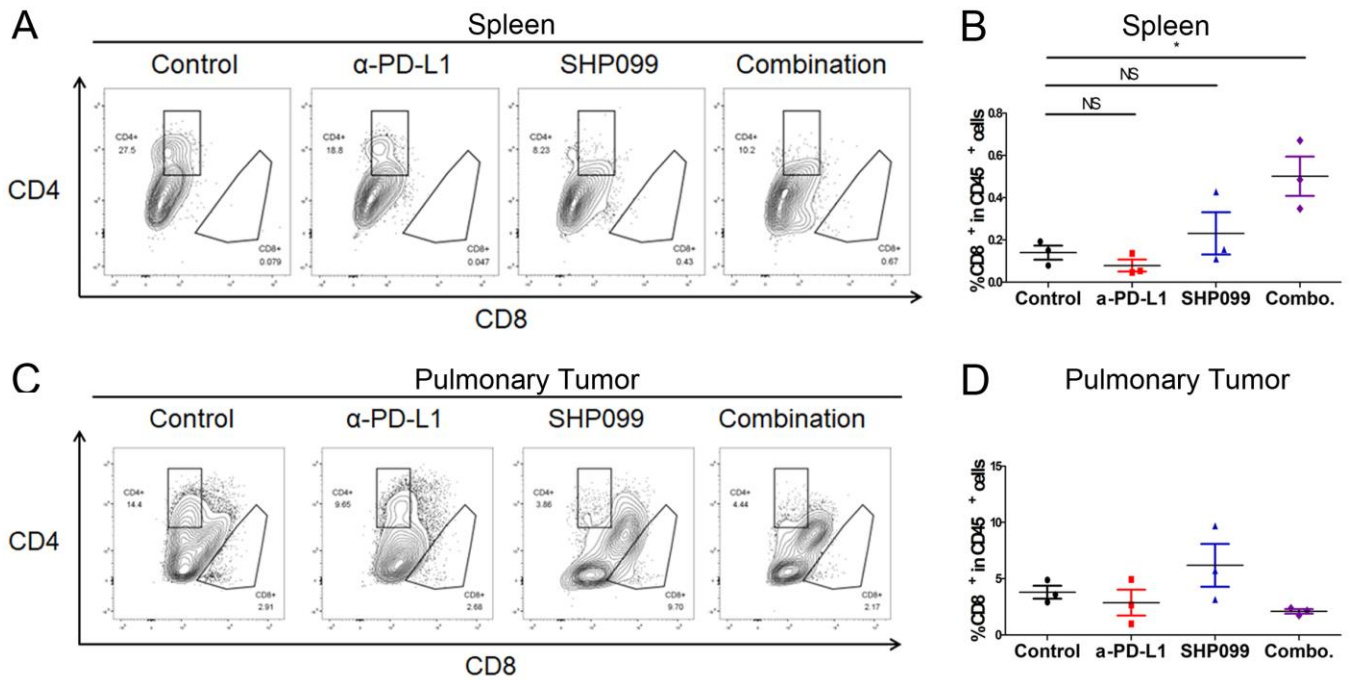

**Supplementary Figure 3. Corresponding representative dot plots for the quantification in figure 2A and additional T cell composition analysis in the study of D2.A1 model.** A, Representative dot plots of CD4<sup>+</sup> and CD8<sup>+</sup> population as a frequency of CD45<sup>+</sup> cells in isolated spleens of each group. B, Quantification of CD8<sup>+</sup> populations as a frequency of CD45<sup>+</sup> cells in isolated spleens of each group. NS: not significant, \*p<0.05, n=3. C, Representative dot plots of CD4<sup>+</sup> and CD8<sup>+</sup> population as a frequency of CD45<sup>+</sup> cells in isolated lung tissues (right) of each group. D, Quantification of CD8<sup>+</sup> populations as a frequency of CD45<sup>+</sup> cells in isolated lung tissues (right) of each group.
