# Supplementary material for: Tumor Cell–Autonomous SHP2 Contributes to Immune Suppression in Metastatic Breast Cancer
Source: PubMed Central journal article supplement (PMC10035406; doi:10.1158/2767-9764.crc-22-0117), 2022-10-03
Supplement: crc-22-0117-s06.pdf [file crc-22-0117-s06.pdf]

## Supplementary Figure 4

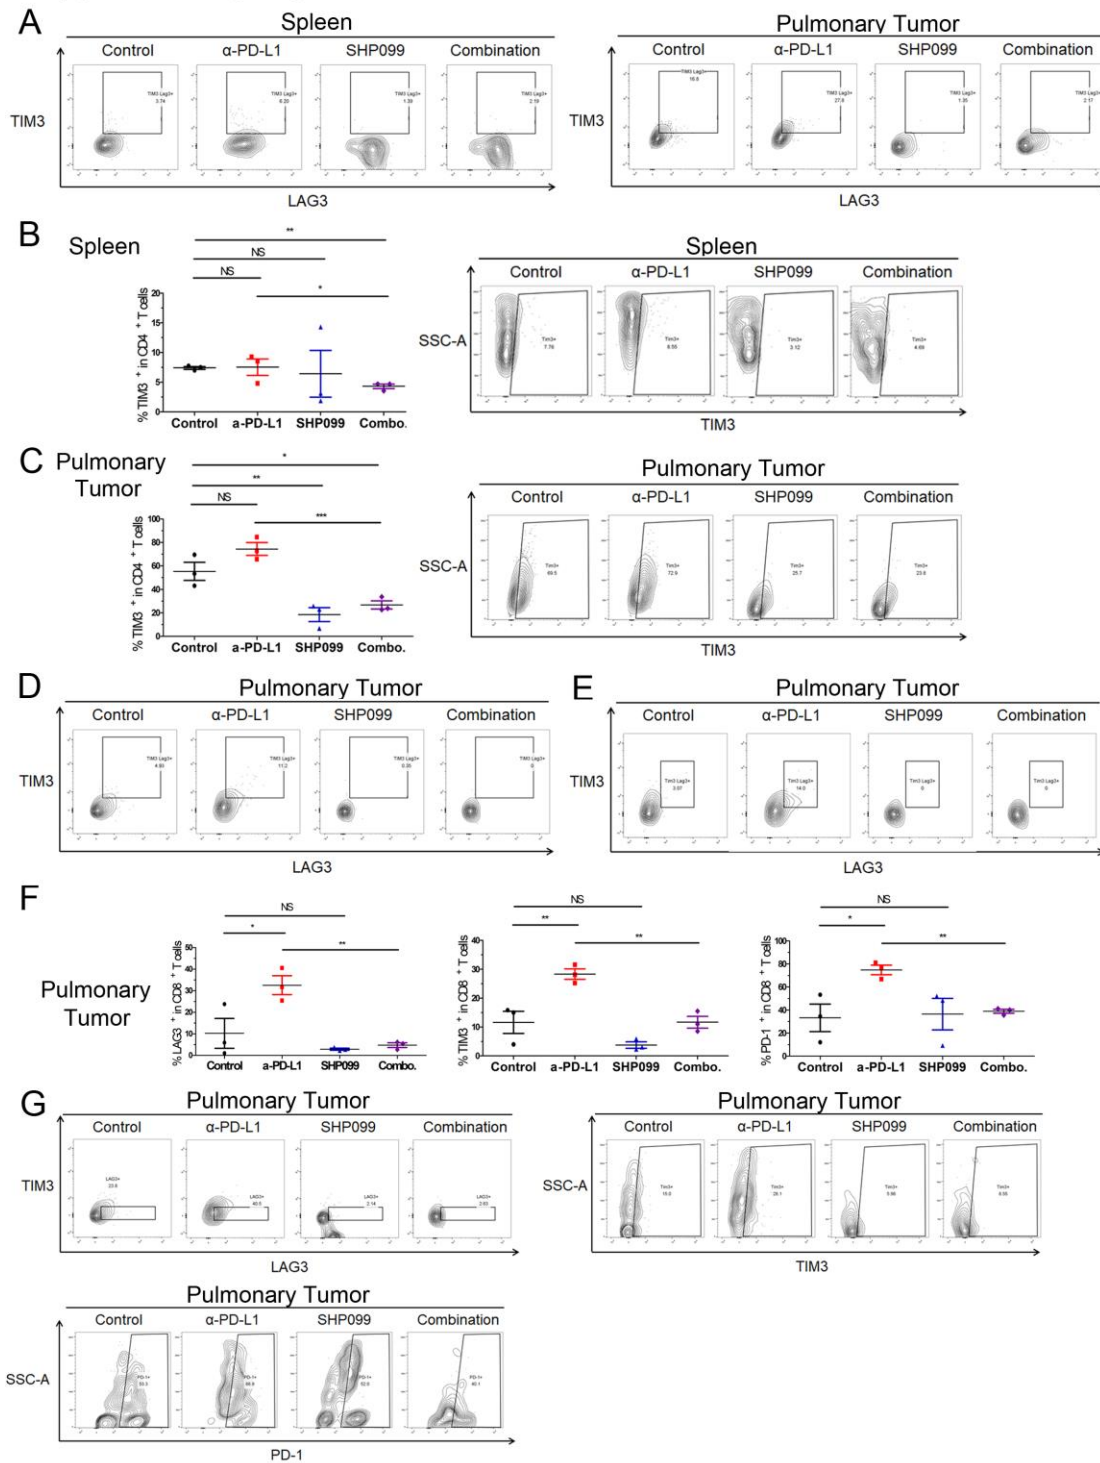

**Supplementary Figure 4. Corresponding representative dot plots for the quantification in figure 2B-C and additional T cell exhaustion marker analysis in the study of D2.A1 model.** A, Representative dot plots of TIM3<sup>+</sup>LAG3<sup>+</sup> population as a frequency of CD45<sup>+</sup>CD4<sup>+</sup> cells in isolated spleens (left) and lung tissues (right) of each group. B, C, Quantification and representative dot plots of TIM3<sup>+</sup> population as a frequency of CD45<sup>+</sup>CD4<sup>+</sup> cells in isolated spleens (B) and lung tissues (C) of each group. D, E, Representative dot plots of TIM3<sup>+</sup>LAG3<sup>+</sup> population as a frequency of CD45<sup>+</sup>CD8<sup>+</sup> cells (D) and CD45<sup>+</sup>CD8<sup>+</sup>PD-1<sup>+</sup> cells (E) of in isolated lung tissues of each group. F, Quantification of LAG3<sup>+</sup> (left), TIM3<sup>+</sup> (middle) and PD-1<sup>+</sup> (right) population as a frequency of CD45<sup>+</sup>CD8<sup>+</sup> cells in isolated lung tissues of each group. G, Representative dot plots of the quantification in F. In all panels, NS: not significant, \**p*<0.05, \*\**p*<0.01, \*\*\**p*<0.001, *n*=3.
