# Supplementary material for: Tumor Cell–Autonomous SHP2 Contributes to Immune Suppression in Metastatic Breast Cancer
Source: PubMed Central journal article supplement (PMC10035406; doi:10.1158/2767-9764.crc-22-0117), 2022-10-03
Supplement: crc-22-0117-s07.pdf [file crc-22-0117-s07.pdf]

## Supplementary Figure 5

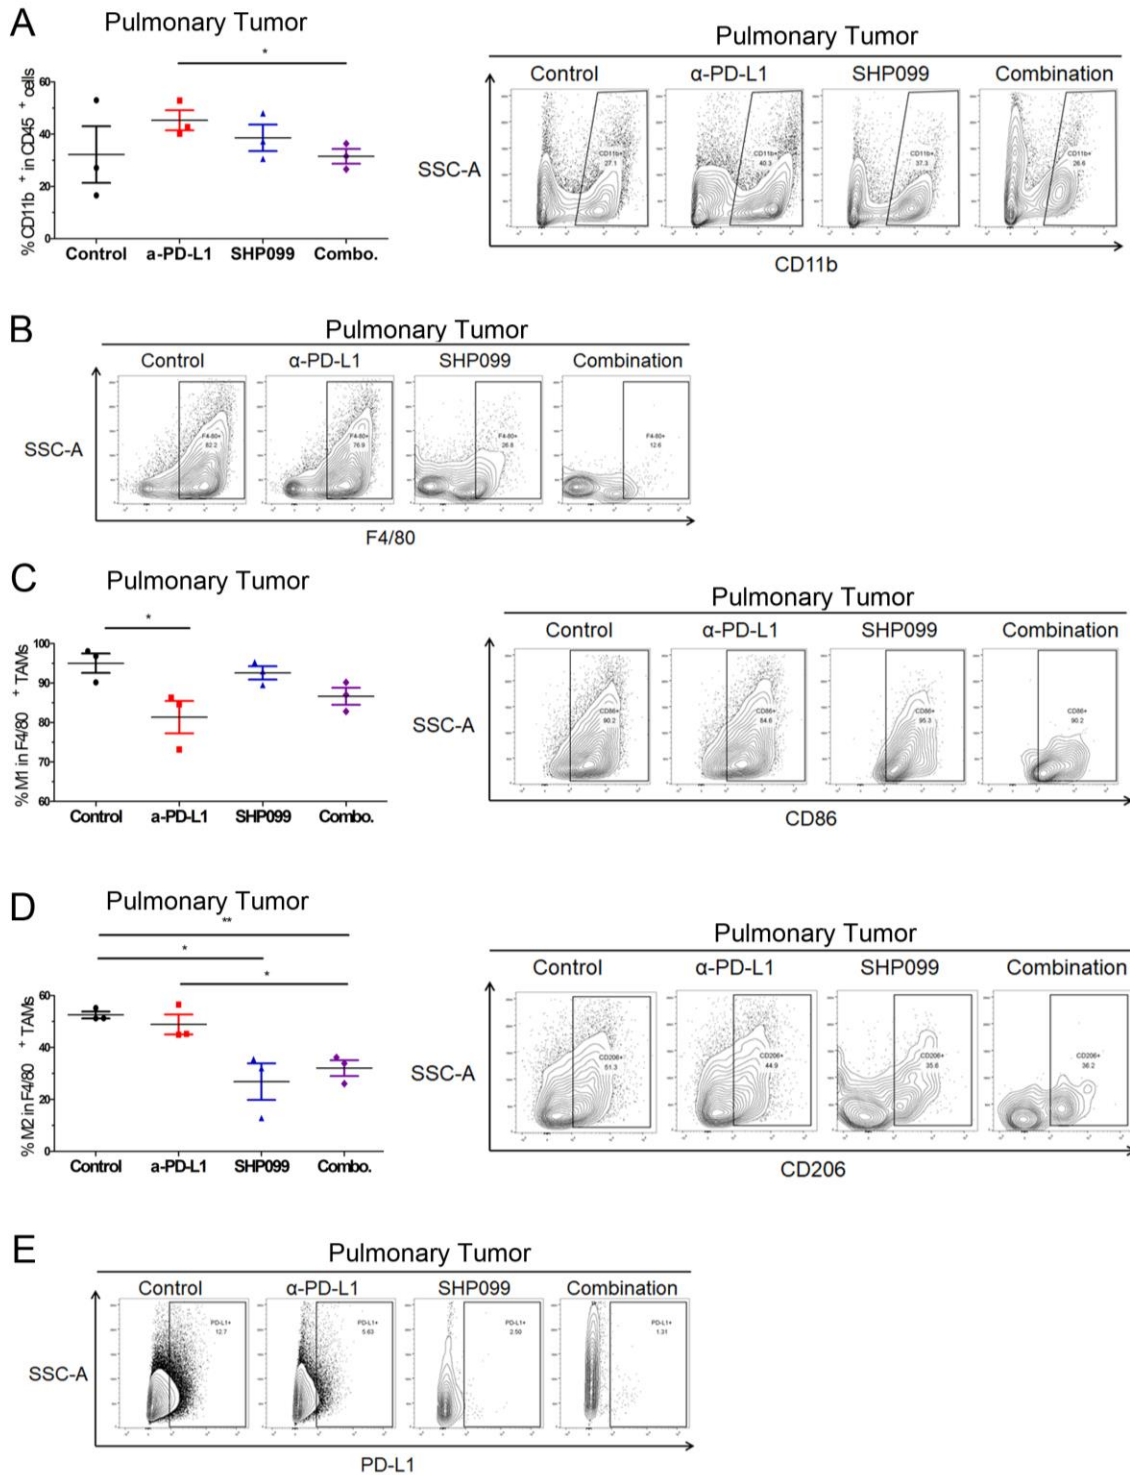

**Supplementary Figure 5. Corresponding representative dot plots for the quantification in figure 2D-F and additional myeloid composition analysis in the study of D2.A1 model.** A, Representative dot plots and quantification of CD11b<sup>+</sup> population as a frequency of CD45<sup>+</sup> cells in isolated lung tissues of each group. B, Representative dot plots of F4/80<sup>+</sup> population as a frequency of CD45<sup>+</sup>CD11b<sup>+</sup> cells in isolated lung tissues of each group. C, D, Representative dot plots and quantification of CD86<sup>+</sup> (C) and CD206<sup>+</sup> (D) population as a frequency of CD45<sup>+</sup>CD11b<sup>+</sup>F4/80<sup>+</sup> cells in isolated lung tissues of each group. In all panels, \*p<0.05, \*\*p<0.01, n=3. E, Representative dot plots of PD-L1<sup>+</sup> population as a frequency of CD45<sup>-</sup> cells in isolated lung tissues of each group.
