# Supplementary material for: Tumor Cell–Autonomous SHP2 Contributes to Immune Suppression in Metastatic Breast Cancer
Source: PubMed Central journal article supplement (PMC10035406; doi:10.1158/2767-9764.crc-22-0117), 2022-10-03
Supplement: crc-22-0117-s10.pdf [file crc-22-0117-s10.pdf]

## Supplementary Figure 8

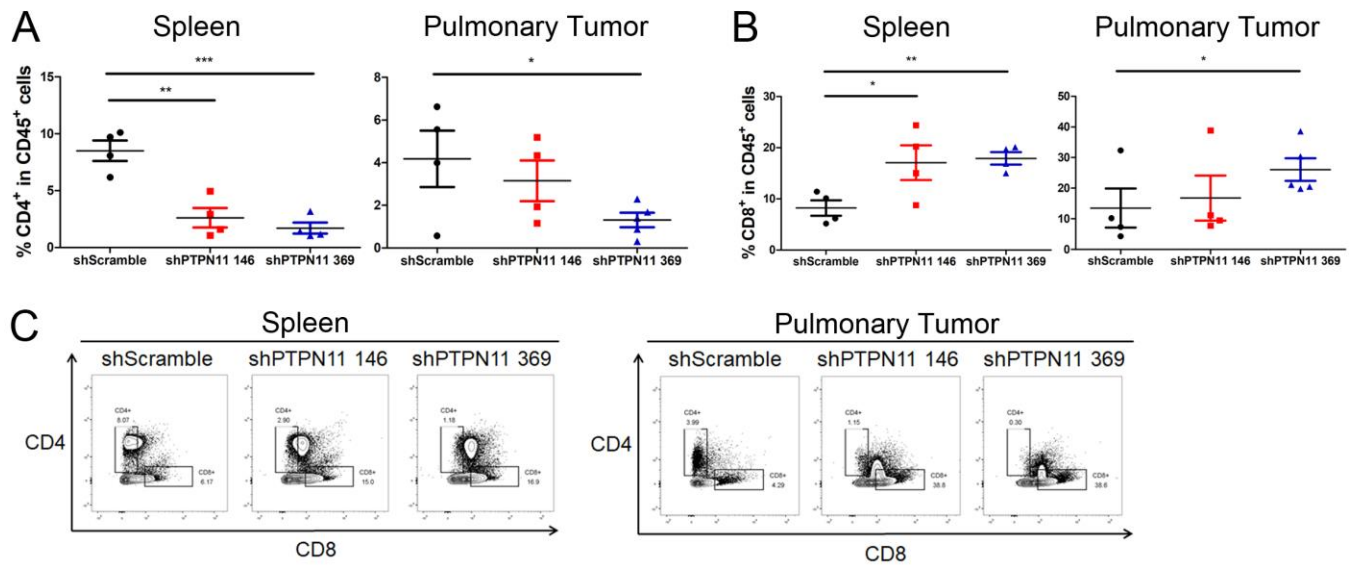

**Supplementary Figure 8. T cell composition analysis in mice bearing SHP2 manipulated 4T1 metastases and representative dot plots for data shown in figure 4A.** A, B, Quantification of CD4<sup>+</sup> (A) and CD8<sup>+</sup> (B) population as a frequency of CD45<sup>+</sup> cells in isolated spleens (left) and lung tissues (right) of each group. In all panels, \* $p < 0.05$ , \*\* $p < 0.01$ , \*\*\* $p < 0.001$ ;  $n = 4$  for shScramble and shPTPN11 146,  $n = 5$  for shPTPN11 369 in Pulmonary Tumor panels,  $n = 4$  for each group in Spleen panels. C, Representative dot plots of CD4<sup>+</sup> and CD8<sup>+</sup> population as a frequency of CD45<sup>+</sup> cells in isolated spleens (left) and lung tissues (right) of each group.
