# Supplementary material for: Tumor Cell–Autonomous SHP2 Contributes to Immune Suppression in Metastatic Breast Cancer
Source: PubMed Central journal article supplement (PMC10035406; doi:10.1158/2767-9764.crc-22-0117), 2022-10-03
Supplement: crc-22-0117-s12.pdf [file crc-22-0117-s12.pdf]

# Supplementary Figure 10

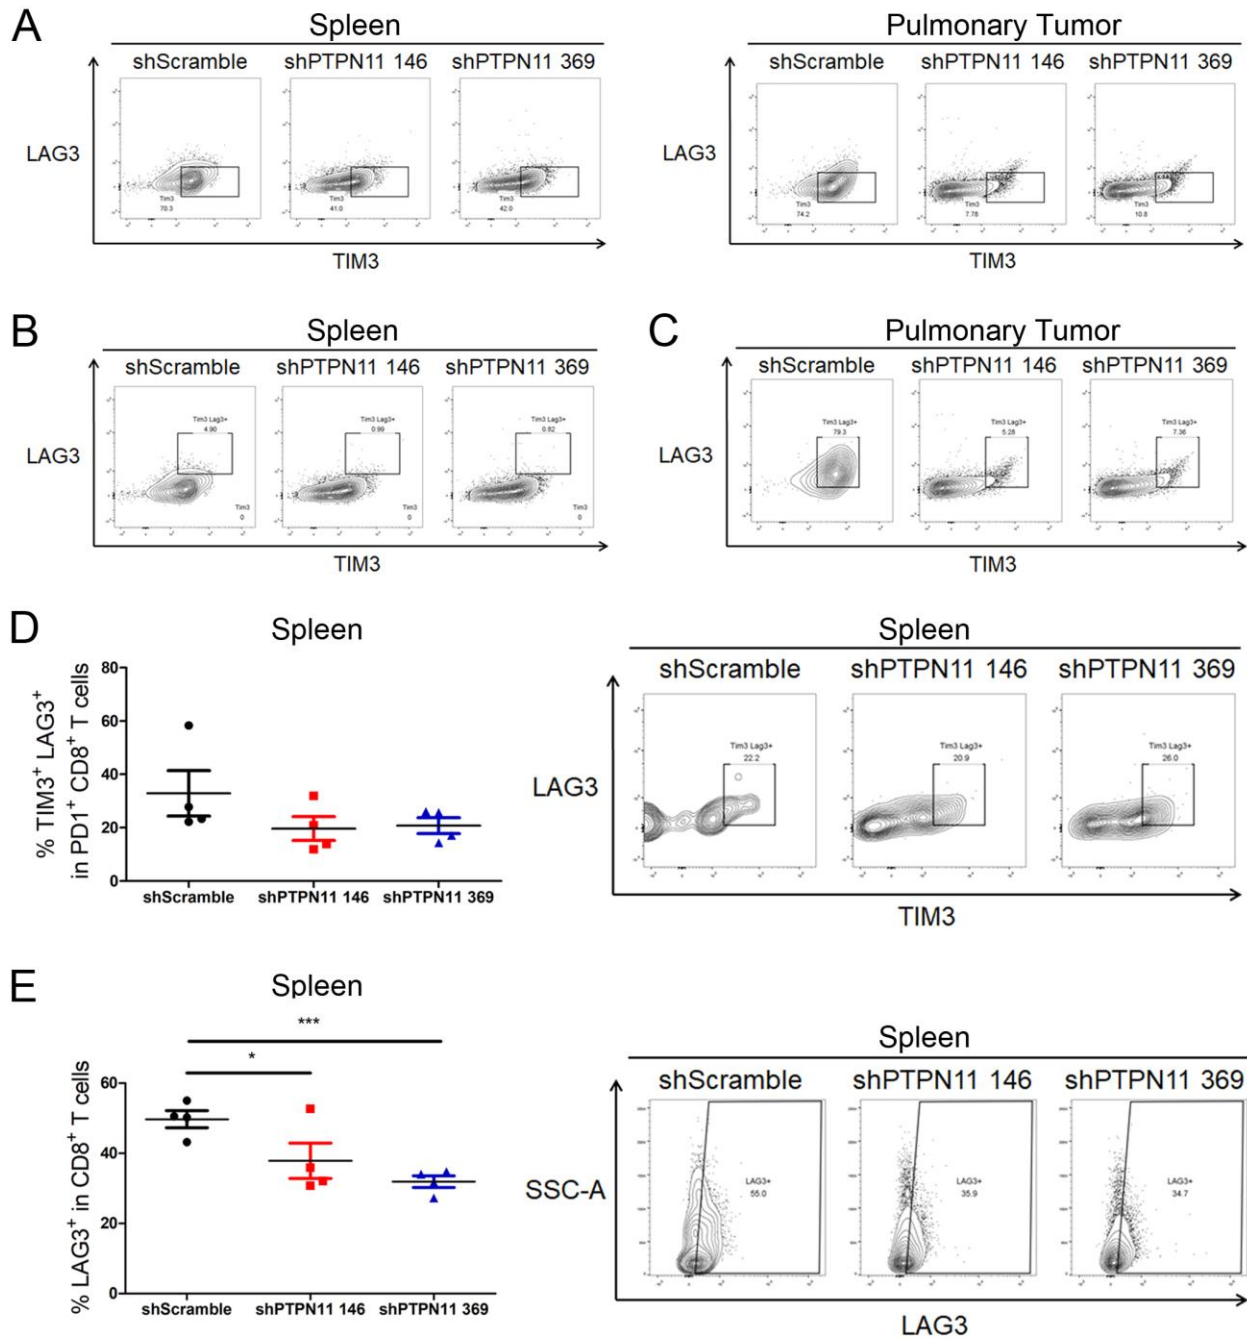

**Supplementary Figure 10. Representative dot plots for data shown in figure 4D-F and additional exhaustion marker analysis of CD8<sup>+</sup> T cells in mice bearing SHP2 manipulated 4T1 metastases.** A, Representative dot plots of TIM3<sup>+</sup> population as a frequency of CD45<sup>+</sup>CD8<sup>+</sup> cells in isolated spleens (left) and lung tissues (right) of each group. B, Representative dot plots of TIM3<sup>+</sup>LAG3<sup>+</sup> population as a frequency of CD45<sup>+</sup>CD8<sup>+</sup> cells in isolated spleens of each group. C, Representative dot plots of TIM3<sup>+</sup>LAG3<sup>+</sup> population as a frequency of CD45<sup>+</sup>CD8<sup>+</sup>PD-1<sup>+</sup> cells in isolated lung tissues of each group. D, Representative dot plots and quantification of TIM3<sup>+</sup>LAG3<sup>+</sup> population as a frequency of CD45<sup>+</sup>CD8<sup>+</sup>PD-1<sup>+</sup> cells in isolated spleens of each group. E, Representative dot plots and quantification of LAG3<sup>+</sup> population as a frequency of CD45<sup>+</sup>CD8<sup>+</sup> cells in isolated spleens of each group. In all panels, \*p<0.05, \*\*\*p<0.001, n = 4.
