# Supplementary material for: Tumor Cell–Autonomous SHP2 Contributes to Immune Suppression in Metastatic Breast Cancer
Source: PubMed Central journal article supplement (PMC10035406; doi:10.1158/2767-9764.crc-22-0117), 2022-10-03
Supplement: crc-22-0117-s13.pdf [file crc-22-0117-s13.pdf]

# Supplementary Figure 11

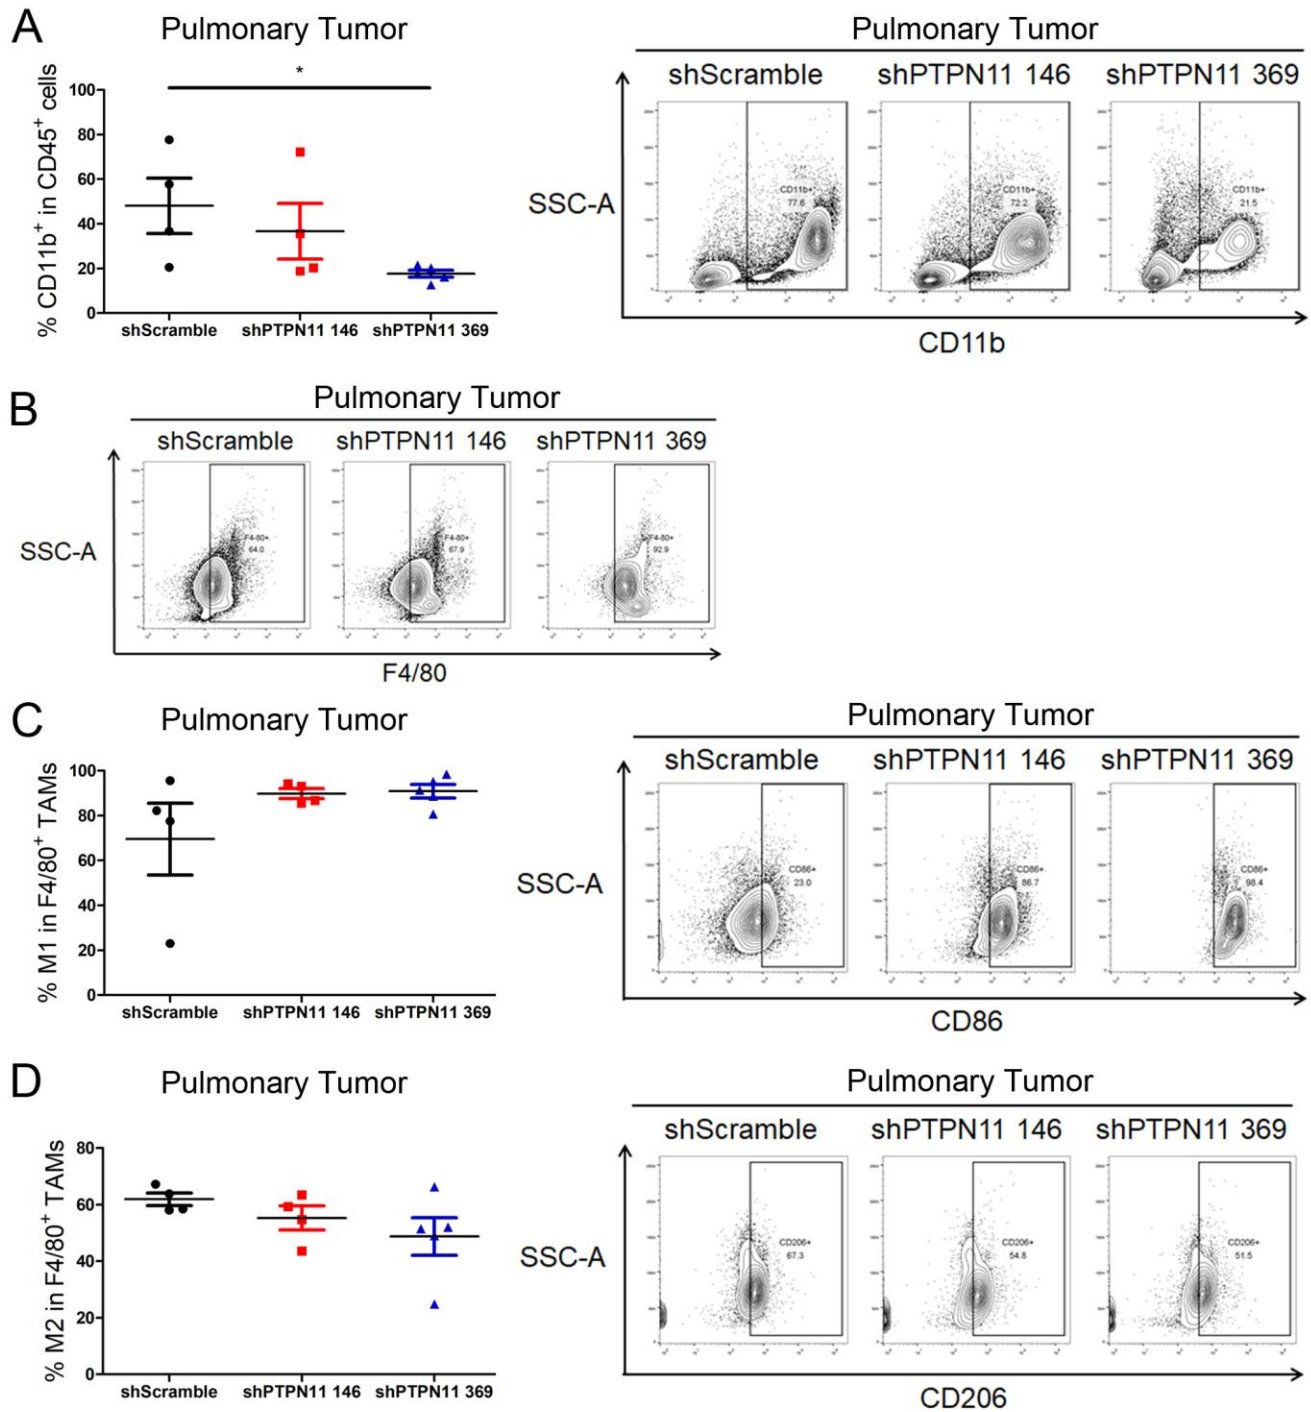

**Supplementary Figure 11. Representative dot plots for data shown in figure 4G-H and additional myeloid composition analysis in mice bearing 4T1 metastases.** A, Representative dot plots and quantification of CD11b<sup>+</sup> population as a frequency of CD45<sup>+</sup> cells in isolated lung tissues of each group. B, Representative dot plots of F4/80<sup>+</sup> population as a frequency of CD45<sup>+</sup>CD11b<sup>+</sup> cells in isolated lung tissues of each group. C, D, Representative dot plots and quantification of CD86<sup>+</sup> (C) and CD206<sup>+</sup> (D) population as a frequency of CD45<sup>+</sup>CD11b<sup>+</sup>F4/80<sup>+</sup> cells in isolated lung tissues of each group. In all panels, \*p<0.05, n = 4 for shScramble and shPTPN11 146, n = 5 for shPTPN11 369.
