# Supplementary material for: Tumor Cell–Autonomous SHP2 Contributes to Immune Suppression in Metastatic Breast Cancer
Source: PubMed Central journal article supplement (PMC10035406; doi:10.1158/2767-9764.crc-22-0117), 2022-10-03
Supplement: crc-22-0117-s15.pdf [file crc-22-0117-s15.pdf]

## Supplementary Figure 13

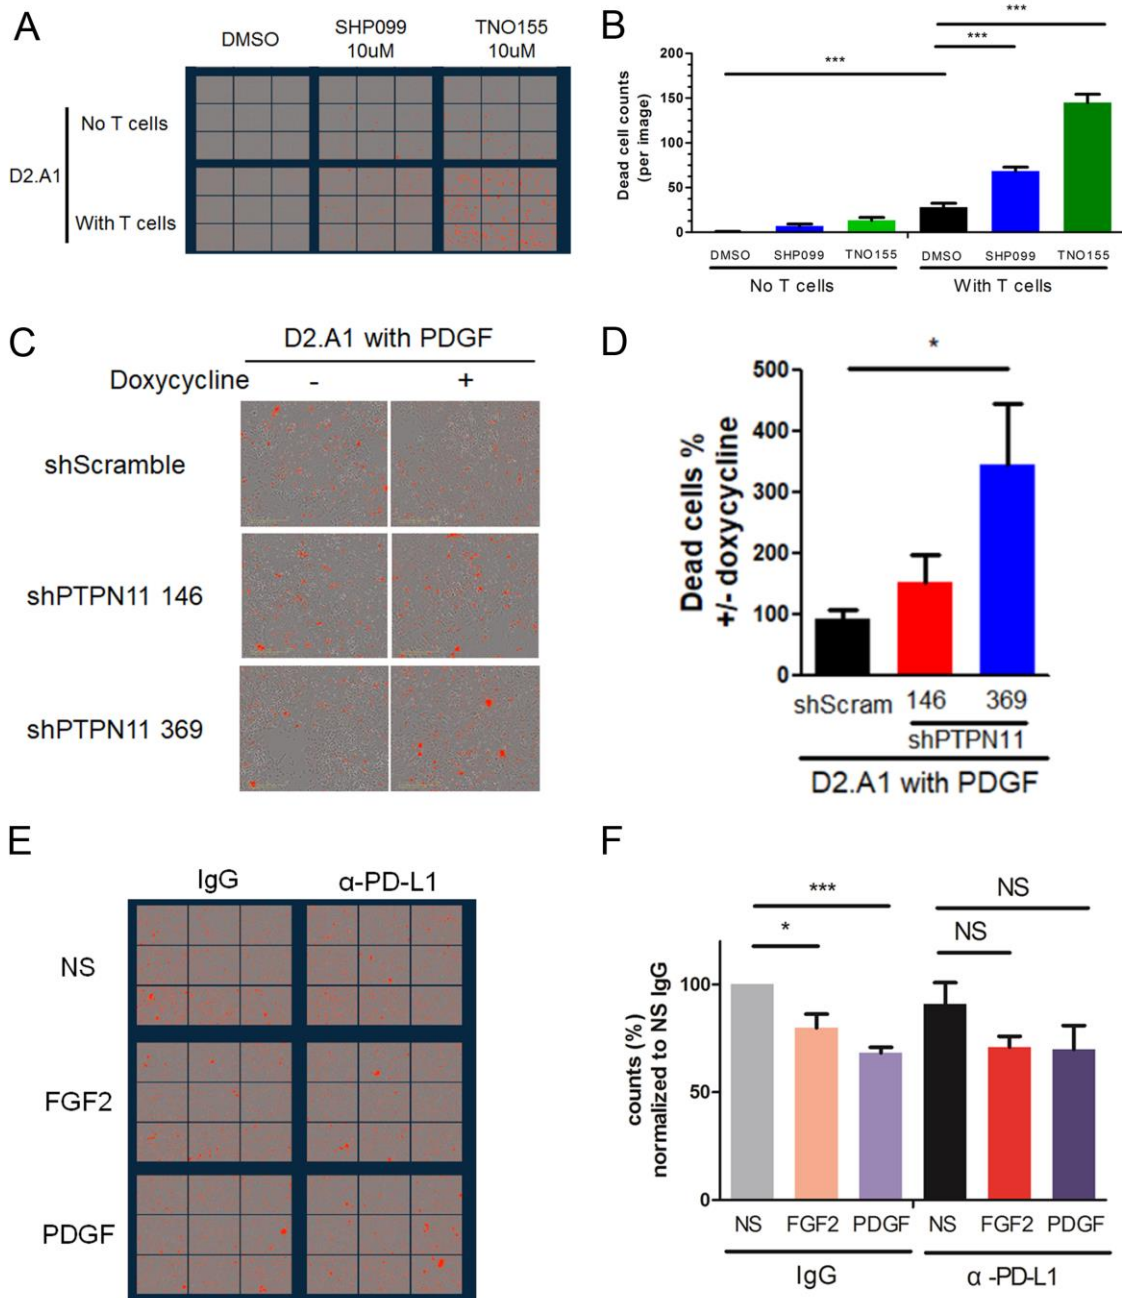

### Supplementary Figure 13. Inhibition or depletion of SHP2 and PD-L1 blockade rescue T cell cytotoxicity.

A, Representative images of the D2.A1 cells at 1 hour following co-culturing with T cells and treated with SHP099 or TNO155. The D2.A1 cells without T cells served as background. B, Bar graph comparing the dead cell counts per image with different treatments, \*\*\* $p < 0.001$ ,  $n = 9$ . C, Representative images of the D2.A1 shScramble and shPTPN11 146, 369 cells treated with/without doxycycline under the stimulation of PDGF (100ng/ml) at 1 hour following co-culturing with T cells. D, Bar graph comparing the percentage of dead cell counts with doxycycline normalized to no doxycycline. \* $p < 0.05$ ,  $n = 9$ . E, Representative images of the D2.A1 cells treated with FGF2/PDGF and IgG/ $\alpha$ -PD-L1 (10 $\mu$ g/ml) at 1 hour following co-culturing with T cells. F, Bar graph comparing the percentage of dead cell counts with different treatments normalized to No Stem (ns) IgG group. NS: not significant, \* $p < 0.05$ , \*\*\* $p < 0.001$ ,  $n = 4$  individual repeats.
