# Supplementary material for: Tumor Cell–Autonomous SHP2 Contributes to Immune Suppression in Metastatic Breast Cancer
Source: PubMed Central journal article supplement (PMC10035406; doi:10.1158/2767-9764.crc-22-0117), 2022-10-03
Supplement: crc-22-0117-s16.pdf [file crc-22-0117-s16.pdf]

# Supplementary Figure 14

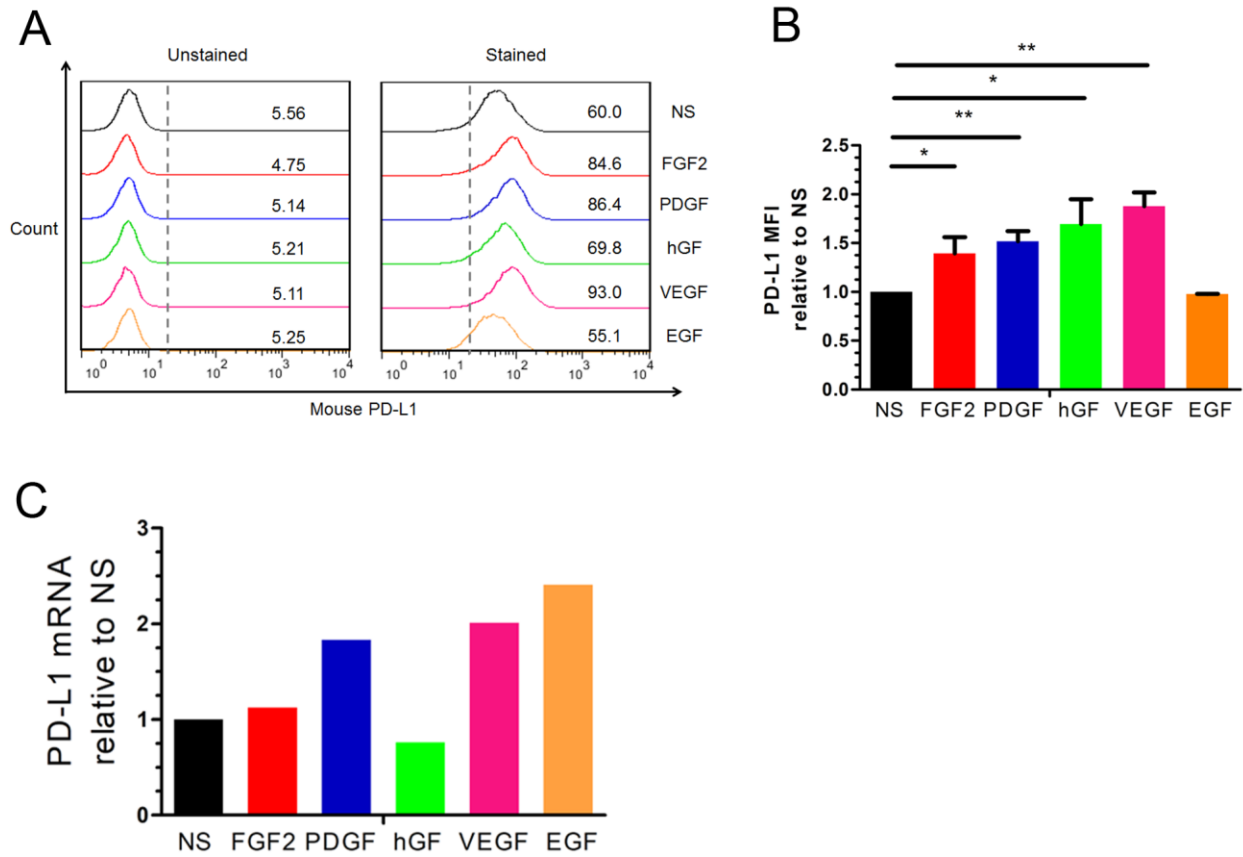

**Supplementary Figure 14. PD-L1 expression is induced by growth factor stimulation in the D2.A1 cells.** A, Cell surface analysis of PD-L1 in D2.A1 cells induced by different growth factors using flow cytometry. B, Bar graph comparing fold change of PD-L1 Mean Fluorescence Intensity (MFI) induced by different growth factors compared to no stimulation (NS). \* $p < 0.05$ , \*\* $p < 0.01$ ,  $n = 3$ . C, Bar graph comparing fold change of PD-L1 mRNA normalized to GAPDH induced by different growth factors compared to no stem (NS).
