# Supplementary material for: Tumor Cell–Autonomous SHP2 Contributes to Immune Suppression in Metastatic Breast Cancer
Source: PubMed Central journal article supplement (PMC10035406; doi:10.1158/2767-9764.crc-22-0117), 2022-10-03
Supplement: crc-22-0117-s17.pdf [file crc-22-0117-s17.pdf]

## Supplementary Figure 15

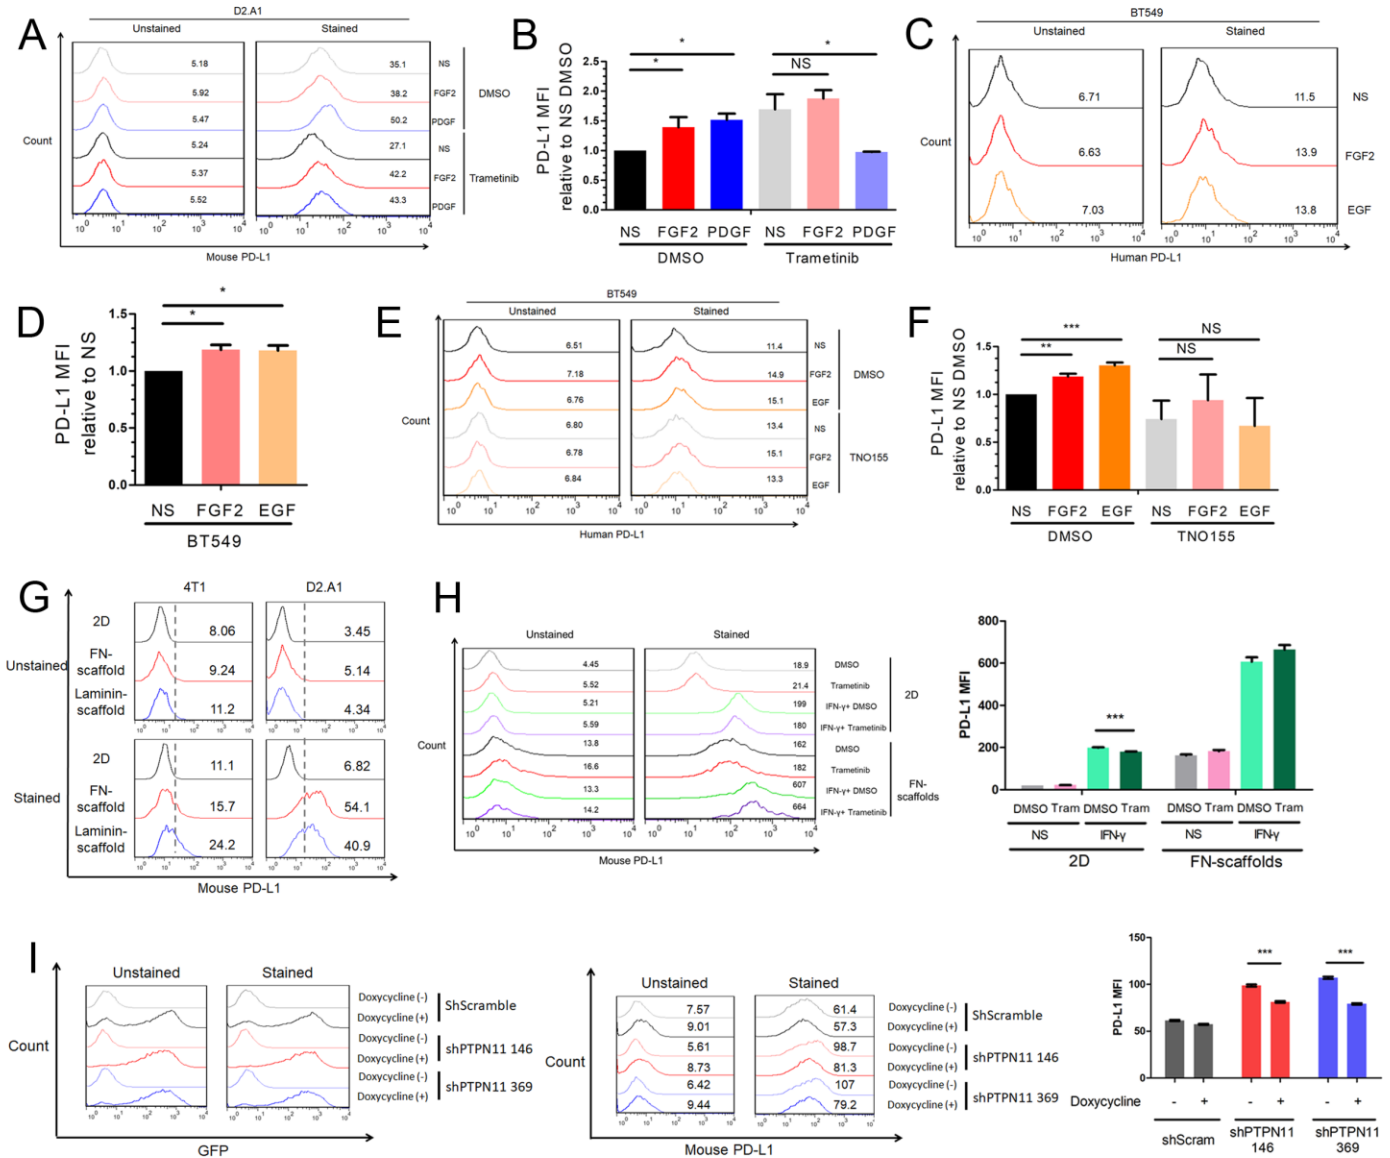

**Supplementary Figure 15. Growth factors and 3D culture environment induce PD-L1 in MBC cells.** A, B, Cell surface analysis of PD-L1 using flow cytometer and bar graph comparing fold change of PD-L1 Mean MFI in D2.A1 cells induced by FGF2 / PDGF and treated with Trametinib. NS: not significant, \*p<0.05, n=3. C, Cell surface analysis of PD-L1 in BT549 cells induced by FGF2 and EGF using flow cytometer. D, Bar graph comparing fold change of PD-L1 Mean Fluorescence Intensity (MFI) induced by FGF2 and EGF compared to no stem (NS). \*p<0.05, n=3. E, F, Cell surface analysis of PD-L1 using flow cytometer and bar graph comparing fold change of PD-L1 Mean MFI in BT549 cells induced by FGF2 / EGF and treated with TNO155. NS: not significant, \*\*p<0.01, \*\*\*p<0.001, n=3. G, Cell surface analysis of PD-L1 using flow cytometer in 4T1 and D2.A1 cells cultured on fibronectin-coated or laminin-coated scaffolds compared to 2D culture. H, Cell surface analysis and quantification of PD-L1 using flow cytometer comparing D2.A1 cells cultured on fibronectin-coated scaffolds treated with Trametinib and interferon-γ to 2D culture. I, Cell surface analysis and quantification of eGFP and PD-L1 using flow cytometer showing the influence of cell surface PD-L1 by doxycycline inducible depletion of SHP2 in D2.A1 cells.
