# Supplementary material for: Tumor Cell–Autonomous SHP2 Contributes to Immune Suppression in Metastatic Breast Cancer
Source: PubMed Central journal article supplement (PMC10035406; doi:10.1158/2767-9764.crc-22-0117), 2022-10-03
Supplement: crc-22-0117-s18.pdf [file crc-22-0117-s18.pdf]

## Supplementary Figure 16

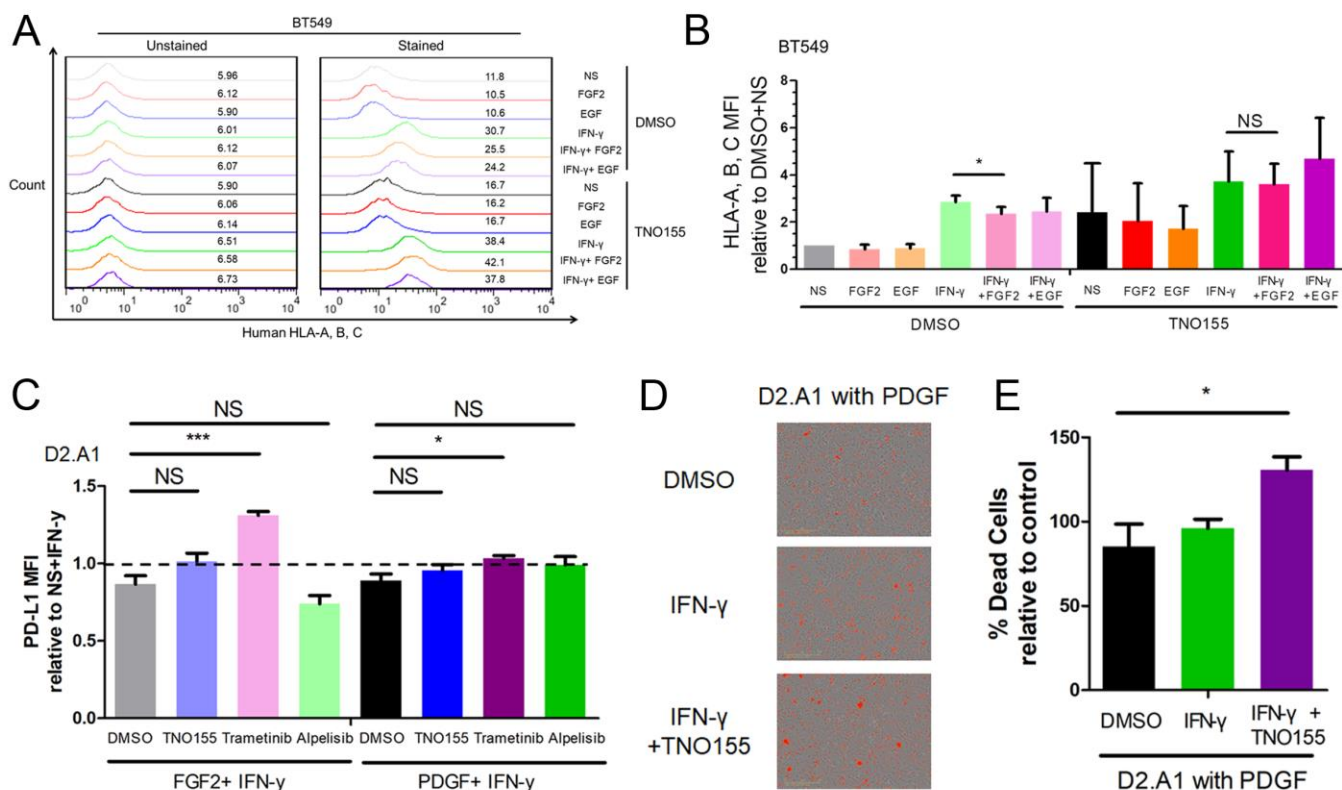

**Supplementary Figure 16. SHP2 regulates MHC class I expression via the balance between MAPK and STAT1 signaling in human MBC cells.** A, Cell surface analysis of HLA-A,B,C in BT549 cells treated with different growth factors, human interferon- $\gamma$  (200ng/ml) and TNO155 (5 $\mu$ M) using flow cytometer. B, Bar graph comparing fold change of HLA-A,B,C MFI induced by different growth factors, interferon- $\gamma$  and TNO155 compared to DMSO + no stem group. NS: not significant, \*p<0.05, n=3. C, Bar graph comparing fold change of PD-L1 MFI induced by different growth factors and interferon- $\gamma$  compared to interferon- $\gamma$  alone with different inhibitors in D2.A1 cells. NS: not significant, \*\*p<0.01, \*\*\*p<0.001, n=3. D, Representative images of the D2.A1 cells treated with interferon- $\gamma$  (200ng/ml) and interferon- $\gamma$  (200ng/ml) + TNO155 (5 $\mu$ M) under PDGF (100ng/ml) stimulation at 1 hour following co-culturing with T cells. E, Bar graph comparing the percentage of dead cell counts with different treatments normalized to control (DMSO only with no PDGF). \*p<0.05, n=4 individual repeats.
